# Supplementary material
Source: publisher figshare collection journal article supplement (https://gsapubs.figshare.com/articles/dataset/_/16674586)
Supplement: Supplementary file 1 [file 1]

Gilmullina, A., Klausen, T.G., Doré, A.G., Rossi, V.M., Suslova, A., and Eide, C.H., 2021, Linking sediment supply variations and tectonic evolution in deep time, source-to-sink systems—The Triassic Greater Barents Sea Basin: GSA Bulletin, <https://doi.org/10.1130/B36090.1>.

## Supplemental Material

BQART Monte-Carlo Simulation and input parameters
